# Supplementary material for: Genetic sources and loci for Fusarium head blight resistance in bread wheat
Source: Front Genet. 2022 Sep 30;13:988264. doi: 10.3389/fgene.2022.988264 (PMC9561102; doi:10.3389/fgene.2022.988264)
Supplement: Supplementary file 2 [file Table1.XLSX]

## Sheet: Sheet1
GenotypingNo	CIMMYT GID	Name/Pedigree	Origin	Group	Fhb1	Mean_MX-spray(%)	Mean_MX-DON(μg/g）	Mean_CN-point	Mean_CN-spawn	Mean_CN-pointDON(μg/g）	MX-spray18	MX-spray19	MX-DON18	MX-DON19	CN-point18	CN-point19	CN-point20	CN-spawn18	CN-spawn19	CN-point_DON18	CN-point_DON19	CN-point_DON20
PA20FMXH000001	415815	BOBWHITE	CIMMYT	1B	No	24.4606	7.25	10.6333	6.275	152.108	16.4204	32.5007	10.9	3.6	5.8	16.5	9.6	10.8	1.75	86.3429	234.072	135.909
PA20FMXH000002	267106	IOC 813	Brazil	1B	No	21.1494	8.075	9.15	7.7	63.2397	14.8445	27.4543	11.2	4.95	5.8	12.5	9.15	13.4	2	35.8482	114.341	39.53
PA20FMXH000003	41939	AMSEL	CIMMYT	1A	No	8.02609	8.425	8.46818	4.83333	85.4676	8.19048	7.8617	10.7	6.15	6.8	12.4545	6.15	4.66667	5	95.9615	115.871	44.5705
PA20FMXH000004	42158	SPINEBILL	CIMMYT	1B	No	12.3847	9.825	10.8121	7.7	75.4358	7.63062	17.1389	12.55	7.1	6.63636	14.1	11.7	13.9	1.5	69.8221	101.048	55.4373
PA20FMXH000005	419712	THORNBIRD	Brazil	1A	No	13.4046	8.9	11.1	4.31667	192.886	6.78992	20.0194	11.9	5.9	8.7	15.9	8.7	7.3	1.33333	NA	338.778	46.9954
PA20FMXH000006	391979	VL 616	India	1B	No	48.6927	9.425	13.3	8	128.467	84.8461	12.5393	14.5	4.35	9.3	18.6	12	13.5	2.5	63.6174	246.198	75.5845
PA20FMXH000007	435966	GONDO	CIMMYT	1B	No	12.9126	8.2	10.135	5.83333	42.3107	4.9656	20.8597	10.15	6.25	7.375	13.4	9.63	7	4.66667	25.3104	61.9557	39.6658
PA20FMXH000008	663578	CATBIRD	CIMMYT	1A	No	16.6629	6.025	7.67222	3.85	75.3972	10.4733	22.8524	5.8	6.25	4.66667	11.9	6.45	6.2	1.5	29.5303	181.831	14.8304
PA20FMXH000009	988167	MAYOOR	CIMMYT	1B	No	1.55478	4.1	8.25	3	63.2836	0.770389	2.33918	5.95	2.25	7.7	10	7.05	5	1	67.3301	104.737	17.7833
PA20FMXH000010	547942	NG8201/KAUZ	CIMMYT	2A	No	13.168	8.375	2.38333	2.46667	27.6548	9.72781	16.6081	10.45	6.3	1.3	4.7	1.15	2.6	2.33333	23.549	40.7607	18.6545
PA20FMXH000011	19089	BR 23	Brazil	1A	No	18.1458	6.7	8.75	5.1	63.8838	10.9539	25.3377	8.8	4.6	4.5	12.3	9.45	8.8	1.4	36.7135	129.558	25.3798
PA20FMXH000012	59920	IAN 8-PIRAPO	Paraguay	1B	No	23.5439	7.125	9.21667	11.95	92.2423	14.8025	32.2852	9.2	5.05	4	13.6	10.05	16.8	7.1	51.5586	125.49	99.6778
PA20FMXH000013	379919	ESTANZUELA COLIBRI	Uruguay	1B	No	13.8883	5.225	3.23333	9.05714	22.0013	19.9682	7.80844	7.25	3.2	1.1	6.3	2.3	14.4	3.71429	42.8454	13.117	10.0416
PA20FMXH000014	3831115	PRINIA	CIMMYT	1B	No	21.3089	5.325	5.75	11.3	16.3385	16.2119	26.4058	7.05	3.6	3.5	7.8	5.95	16.6	6	28.1776	7.5155	13.3226
PA20FMXH000015	296603	ITAPUA 45 - DON PANI	Ecuador	1B	No	6.88979	4.45	11.2	6.05	144.43	6.87282	6.90676	4.4	4.5	8.5	14	11.1	9.1	3	185.872	159.199	88.2186
PA20FMXH000016	3597505	ITAPUA 50 - AMISTAD	Uruguay	1B	No	13.295	7.625	11.9833	8.875	223.082	5.50356	21.0864	9.05	6.2	8.9	13.7	13.35	6	11.75	183.914	410.602	74.7302
PA20FMXH000017	270168	PROINTA GRANAR	Brazil	1B	No	7.07152	4	3.83333	9.35	16.7468	7.87338	6.26965	5.4	2.6	3.4	4.6	3.5	12.7	6	35.4032	1.91149	12.9258
PA20FMXH000018	2406044	SURUTU-CIAT	Bolivia	1B	No	13.4993	9.775	7.7	5.98333	89.1122	11.2931	15.7056	10.9	8.65	3.3	12	7.8	7.8	4.16667	61.2038	194.728	11.4051
PA20FMXH000019	2410205	COOPERACION MAIPUN	Argentina	1B	No	10.2233	5.85	11.5833	7.125	195.904	11.9529	8.49377	7.35	4.35	9	18.1	7.65	6	8.25	186.97	319.327	81.4143
PA20FMXH000020	2440483	PROINTA ALAZAN	Argentina	1A	No	18.8335	3.45	7	4.33333	6.62991	19.6002	18.0667	3.35	3.55	NA	NA	7	4.33333	NA	NA	NA	6.62991
PA20FMXH000021	5407690	KLCAR/SNB	CIMMYT	1B	No	61.553	9.9	7.61667	18.85	54.2919	60.6061	62.5	9.9	NA	5.9	8.3	8.65	20	17.7	57.5631	22.6813	82.6313
PA20FMXH000022	5408967	BRS BURITI	Brazil	1A	No	1.97392	2.525	4.93333	1	29.9936	1.15835	2.78949	2.85	2.2	3.1	7.9	3.8	1	1	35.1228	28.131	26.7271
PA20FMXH000023	4005864	KLEIN DON ENRIQUE	Argentina	2A	No	3.3417	2.75	3.33333	1.6	9.79467	0.295858	6.38754	3.95	1.55	1.3	3.9	4.8	NA	1.6	18.4471	2.12666	8.8102
PA20FMXH000024	5552007	HUHWA	CIMMYT	1B	No	29.7558	12.55	6.71852	4.91667	59.212	11.7565	47.7552	16.8	8.3	3.55556	9.5	7.1	1.83333	8	51.5311	83.8877	42.2172
PA20FMXH000025	6085788	QUAIU #1	CIMMYT	1B	No	18.1743	12.175	10.1333	15.1429	164.305	13.267	23.0816	13.7	10.65	3	16.3	11.1	10.4286	19.8571	47.0659	377.208	68.6417
PA20FMXH000026	6176054	VALK	CIMMYT	1B	No	36.5787	12.9	10.1167	11.25	144.066	18.0468	55.1107	15.75	10.05	4.4	13.8	12.15	4.7	17.8	80.3147	301.21	50.674
PA20FMXH000027	6175409	WAXBILL	CIMMYT	1B	No	23.4976	12.325	8.16667	8.46528	67.3891	16.253	30.7422	16.8	7.85	3	12.2	9.3	6.55556	10.375	40.0092	141.25	20.9086
PA20FMXH000028	6174949	QUELEA	CIMMYT	1B	No	25.3032	12.7	7.63148	10.05	86.8493	20.9699	29.6365	16.5	8.9	2.44444	11.3	9.15	6.7	13.4	34.985	179.43	46.1328
PA20FMXH000029	7806808	BORLAUG100 F2014	CIMMYT	1B	No	31.7006	9.325	11.9333	20	144.23	25.7285	37.6726	10.4	8.25	7	13.5	15.3	20	20	95.3743	232.83	104.486
PA20FMXH000030	646145	SABUF	CIMMYT	2A	No	8.6279	8.575	3.13741	4.395	9.43446	5.01124	12.2446	12.3	4.85	1.3	5.22222	2.89	4.5	4.29	8.95162	5.9875	13.3643
PA20FMXH000031	5390612	SUPER 152	CIMMYT	1B	No	17.6547	10.2	7.75	12.69	71.986	27.1914	8.1181	14.8	5.6	2.3	13	7.95	19.6	5.78	51.5918	139.014	25.3517
PA20FMXH000032	6176056	VALK	CIMMYT	1B	No	18.6839	7.825	7.7	11.45	51.772	18.188	19.1799	7.6	8.05	6.3	6	10.8	9.2	13.7	29.7396	31.2871	94.2893
PA20FMXH000033	3888	VEERY	CIMMYT	1B	No	54.7794	10.625	8.43333	18.3	72.374	56.1583	53.4004	14.95	6.3	3.7	10.5	11.1	20	16.6	60.2643	94.4224	62.4354
PA20FMXH000034	3855011	VOROBEY	CIMMYT	1B	No	4.28897	7.525	5.83333	3.57143	15.9659	2.83788	5.74005	8.45	6.6	1.4	10.1	6	3.14286	4	9.37214	21.0263	17.4994
PA20FMXH000035	26498	LAS ROSAS INTA	CIMMYT	1B	No	29.3814	11.025	6.8	12.25	28.4746	29.3346	29.4281	15.7	6.35	3.2	7.1	10.1	15.2	9.3	18.9025	10.5338	55.9874
PA20FMXH000036	95143	KLEIN CONDOR	Argentina	1A	No	NA	NA	5.93	7.4	66.3479	NA	NA	NA	NA	5.8	NA	6.06	7.4	NA	10.3706	NA	122.325
PA20FMXH000037	206	KLEIN VENCEDOR	Argentina	1A	No	NA	NA	7.625	4.45	60.9643	NA	NA	NA	NA	3.1	NA	12.15	7.5	1.4	6.40794	NA	115.521
PA20FMXH000039	282484	BUCK AUSTRAL	Argentina	1A	No	NA	NA	NA	8.4	18.5423	NA	NA	NA	NA	NA	NA	NA	8.4	NA	NA	NA	18.5423
PA20FMXH000040	94877	LAUREANO ALVAREZ	Argentina	1A	No	6.86967	2.475	3.96481	10.05	28.9937	5.03517	8.70418	3.15	1.8	1.44444	7.1	3.35	6.1	14	19.744	1.77401	65.4632
PA20FMXH000041	319309	ONCATIVO-INTA	Argentina	1A	No	4.06249	4.05	5.33333	6.475	42.2122	2.45399	5.671	4	4.1	3.7	8.4	3.9	2.75	10.2	19.8605	40.2225	66.5537
PA20FMXH000043	78557	BUCK NAPOSTA	Argentina	1A	Yes	19.6377	4.15	6.4	11.7	52.4909	14.262	25.0135	5.7	2.6	3.8	NA	9	11.7	NA	12.3878	NA	92.5939
PA20FMXH000044	8919	PERGAMINO GABOTO	Argentina	1A	No	NA	NA	6.46667	6.55556	17.364	NA	NA	NA	NA	4.3	8.7	6.4	4.44444	8.66667	16.1728	7.70772	28.2115
PA20FMXH000045	72533	PROINTA FEDERAL	Argentina	1B	No	39.9172	6.55	7.55	13.45	28.9346	30.1342	49.7003	7.05	6.05	1.2	11.1	10.35	14.7	12.2	15.8804	17.7839	53.1396
PA20FMXH000046	87496	BUCK PONCHO	Argentina	1A	No	29.7293	9.975	5.34667	13.35	39.4984	10.6918	48.7669	15.1	4.85	2	4.2	9.84	20	6.7	49.4512	0.864458	68.1796
PA20FMXH000047	108175	PROINTA OASIS	Argentina	1B	No	55.461	8	7.13333	13.3714	18.8669	35.8107	75.1113	11	5	6.6	6.7	8.1	19.6	7.14286	10.2372	5.07092	41.2926
PA20FMXH000048	2900	MARINGA	Brazil	1A	No	11.9839	10.05	11.1907	8.15	103.538	5.14169	18.826	13.15	6.95	8.22222	11.3	14.05	6.6	9.7	140.719	17.5258	152.369
PA20FMXH000049	11428	IAS 20	Brazil	1A	No	NA	NA	5.205	2	13.3458	NA	NA	NA	NA	5.3	NA	5.11	2	NA	7.43243	NA	19.2591
PA20FMXH000050	32597	ENCRUZILHADA	Brazil	1A	No	30.2602	5.625	8.85	6.63889	83.8003	4.68741	55.833	4.7	6.55	8.1	9.6	8.85	2.5	10.7778	54.3343	28.6162	168.45
PA20FMXH000051	8857	TOROPI	Brazil	1A	No	8.93684	3.25	7.73333	2.625	36.5113	6.45161	11.4221	4.6	1.9	3.3	11.2	8.7	NA	2.625	7.23391	20.3661	81.9339
PA20FMXH000052	78595	BR 32	Brazil	1A	No	14.4431	6.025	6.2963	2.88889	21.2414	9.16246	19.7237	8	4.05	2.7	6.88889	9.3	3.44444	2.33333	32.7918	6.72152	24.211
PA20FMXH000054	95395	COLOTANA	Brazil	1A	No	NA	NA	8.63333	4	47.6404	NA	NA	NA	NA	5.3	9.5	11.1	4	NA	4.61958	74.8261	63.4754
PA20FMXH000055	12124	BR 14	Brazil	1A	No	20.8613	6.15	10.1667	12.3	54.1777	11.7953	29.9273	9.2	3.1	3.8	11.1	15.6	7	17.6	15.2394	11.2795	136.014
PA20FMXH000056	100507	EMBRAPA 27	Brazil	1A	No	12.0402	3.075	11.3337	13.35	53.3484	9.66399	14.4163	2.7	3.45	6.11111	9.1	18.79	15.4	11.3	39.9151	36.3913	83.7388
PA20FMXH000057	1278424	ITAPUA 1	Paraguay	1A	No	8.02304	6.025	8.50273	4.59722	47.0498	11.7249	4.3212	8.2	3.85	4.81818	7.9	12.79	6.44444	2.75	12.2717	36.0501	92.8277
PA20FMXH000058	760	CENTENARIO	Uruguay	1A	No	8.71101	5.325	9.79	1.825	12.7982	7.24555	10.1765	7.45	3.2	5	5.9	18.47	2.25	1.4	19.6642	3.54893	15.1814
PA20FMXH000059	345395	ESTANZUELA DAKURU	Uruguay	1A	No	15.74	5.2	11.0333	11.3278	50.7079	12.7451	18.7349	6.95	3.45	4.6	6.6	21.9	9.1	13.5556	44.4642	1.93117	105.728
PA20FMXH000060	304848	INIA BOYERO	Uruguay	1A	No	18.9923	8.8	11.1333	14.1	77.5235	18.9975	18.987	10.9	6.7	4.8	6.2	22.4	19.2	9	24.9898	5.54709	202.034
PA20FMXH000061	407748	ESTANZUELA LUSITANO	Uruguay	1A	No	13.5572	6.975	4.08333	6.85	9.52596	9.58539	17.5291	11.2	2.75	1.1	4.7	6.45	9.7	4	16.2831	1.49475	10.8
PA20FMXH000062	69611	ESTANZUELA HORNERO	Uruguay	1A	No	17.0901	6.425	4.9	13.2333	19.0456	17.3298	16.8504	10.15	2.7	2.4	4.8	7.5	17.8	8.66667	41.471	1.48573	14.1801
PA20FMXH000063	13405	GLENLEA	Canada	1A	No	10.8305	7.4	11.0667	11.6722	102.541	3.53682	18.1243	8.75	6.05	7.3	10.6	15.3	8.9	14.4444	65.0678	170.341	72.2145
PA20FMXH000064	2579273	AC VISTA	Canada	1A	No	16.2706	12.2	8.50833	16.8	184.087	13.1902	19.351	15.7	8.7	8.1	11.625	5.8	16.1	17.5	43.4924	308.03	200.739
PA20FMXH000065	199089	AC BARRIE	Canada	1A	No	13.2021	2.825	4.15	7.6	16.66	13.6503	12.754	3.95	1.7	2.5	NA	5.8	7.6	NA	10.921	NA	22.3989
PA20FMXH000066	3568455	BIGGAR	Canada	1A	No	33.8241	8.775	9.25333	18.35	106.565	35.3421	32.306	9.3	8.25	8.1	14.5	5.16	16.7	20	81.0202	138.02	100.654
PA20FMXH000067	2314	NEEPAWA	Canada	1A	No	13.0809	1.595	4.975	7.4	20.805	11.3372	14.8247	2.7	0.49	5.1	NA	4.85	7.4	NA	16.45	NA	25.16
PA20FMXH000068	193037	STOA	USA	1A	No	21.8006	4.225	5.445	13.6	97.3504	13.2751	30.3262	5.6	2.85	5	NA	5.89	13.6	NA	49.5741	NA	145.127
PA20FMXH000069	8134	WHEATON	USA	1A	No	17.9859	6.5	10.8667	18.1056	121.739	21.2276	14.7441	9.05	3.95	9.6	12.2	10.8	18.1	18.1111	70.5991	72.778	221.84
PA20FMXH000070	1428	MERCURY	USA	1A	No	38.0952	5.7	3.7	5.5	9.85343	38.0952	NA	5.7	NA	3.7	NA	NA	5.5	NA	4.62099	NA	15.0859
PA20FMXH000071	262284	NORSEMAN	USA	1A	No	62.8719	5.95	6.77	20	59.0463	73.8405	51.9032	7.2	4.7	5.1	NA	8.44	20	NA	65.9586	NA	52.1339
PA20FMXH000072	5895561	FLORENCE X AURORE C	France	1A	No	22.9545	14.525	10.6539	16.9444	102.354	29.3358	16.5731	16.45	12.6	8.88889	9.27273	13.8	14.5556	19.3333	47.1897	157.974	101.899
PA20FMXH000073	8750244	MENTANA	Italy	2A	Yes	13.3689	4.725	9.14815	6.14286	63.4934	8.05216	18.6856	6.5	2.95	6.3	12.4444	8.7	2.85714	9.42857	35.892	61.3859	93.2024
PA20FMXH000074	8749469	FUNO	Italy	1A	No	20.4513	8.025	5.61667	4.8	49.0823	17.5258	23.3768	10.7	5.35	4.2	7.3	5.35	4	5.6	44.1629	34.6624	68.4216
PA20FMXH000075	5240369	NEWTHATCH SELECTION	Switzerland	1A	No	6.41142	0.9915	4.35	1.58333	73.2114	3.79806	9.02478	1.2035	0.7795	1	NA	7.7	2.16667	1	8.36305	NA	138.06
PA20FMXH000076	2430154	PBW343	India	2B	No	37.2357	13.075	5.7	15.5	98.6905	41.6444	32.8269	18.3	7.85	3.2	9.8	4.1	20	11	47.7545	115.827	132.49
PA20FMXH000077	404532	SHIN CHUUNAGA	Japan	2B	Yes	18.5221	2.7	3.35	1.625	3.51619	2.12166	34.9226	3.4	2	1.9	3.8	4.35	1.5	1.75	2.60593	1.5672	6.37545
PA20FMXH000079	286603	CHUKO	Japan	2B	No	5.72339	2.45	3.88333	2.125	6.94153	2.25644	9.19034	3.4	1.5	1.8	6.7	3.15	1	3.25	1.36832	15.2961	4.16014
PA20FMXH000084	2826	TOKAI 66	Japan	2B	Yes	5.79254	1.052	3.46296	2.22222	6.11993	0.750037	10.8351	1.4275	0.6765	1.75	4.88889	3.75	1	3.44444	1.23986	7.4753	9.64463
PA20FMXH000085	762	SURPRESA	Brazil	1A	No	11.2411	3.5	5.45	3.44444	30.4226	3.94138	18.5409	5.15	1.85	5.6	6.1	4.65	3.44444	NA	12.7913	70.8155	7.66087
PA20FMXH000086	204008	ESTANZUELA YOUNG	Uruguay	1A	No	3.32222	2.525	7.63333	2.66667	14.3011	1.6765	4.96795	3.15	1.9	4	10.5	8.4	2.83333	2.5	22.7982	17.6179	2.4872
PA20FMXH000087	3819618	AC CRYSTAL	Canada	1A	No	22.7884	5.875	12.15	14.05	145.877	14.3375	31.2394	8	3.75	8.7	11.4	16.35	8.1	20	124.878	209.242	103.51
PA20FMXH000088	10004	SUMAI #3	China	2C	Yes	7.21253	1.24075	3.47593	1.125	11.3275	0.770218	13.6548	1.75	0.7315	1.77778	4.9	3.75	1	1.25	11.6893	7.3473	14.9459
PA20FMXH000089	2589783	HEILO	CIMMYT	1B	No	9.82092	6.3	7.96667	6.53333	101.5	6.08016	13.5617	7.25	5.35	6.9	9.9	7.1	3.4	9.66667	64.847	176.882	62.7711
PA20FMXH000090	422067	OCORONI F 86	CIMMYT	1B	No	10.2246	6.375	11.75	15.1	40.9605	15.3073	5.14196	7.35	5.4	6.4	14.9	13.95	20	10.2	17.34	87.5583	17.9831
PA20FMXH000091	4936163	FALCIN/AE.SQUARROSA (312)/3/THB/CEP7780//SHA4/LIRA	CIMMYT	1B	No	17.8743	10.05	10.2222	9.0625	65.7108	24.6584	11.0902	13.95	6.15	5.66667	13.3	11.7	12	6.125	69.1737	74.8259	53.1329
PA20FMXH000092	5536	GAMENYA	Australia	1A	No	43.4431	10.225	7.95	7.46667	41.2043	24.7142	62.172	15.7	4.75	4.7	8.2	10.95	7.6	7.33333	28.0041	23.4088	72.1999
PA20FMXH000093	22	FRONTANA	Brazil	1A	No	5.79506	2.384	11.5833	3.94444	67.3224	7.17887	4.41124	4.2	0.568	7.3	12.9	14.55	1.33333	6.55556	17.8484	104.53	79.5884
PA20FMXH000094	1283054	BR 14/CEP847	Brazil	1A	No	23.4729	7.95	7.2963	3.93333	19.4657	23.4729	NA	7.95	NA	4.66667	9.22222	8	5.2	2.66667	32.357	7.33577	18.7043
PA20FMXH000096	5552014	KINDE	CIMMYT	1B	No	20.6434	13.05	8.73667	9.85	60.8607	17.8016	23.4853	13.75	12.35	5.7	9.3	11.21	7.1	12.6	51.8141	64.2466	66.5213
PA20FMXH000097	4885566	EMB16/CBRD//CBRD	CIMMYT	1A	No	9.85531	4.25	8.51667	5.13889	66.5348	7.94151	11.7691	4.65	3.85	6.7	11.2	7.65	8.5	1.77778	48.4083	143.32	7.87591
PA20FMXH000098	4877994	BAU/MILAN//CBRD	CIMMYT	1A	No	11.6212	6.1	6.68333	4.4375	8.23433	8.9267	14.3157	7.2	5	2.3	8.9	8.85	4	4.875	9.72891	5.49508	9.47902
PA20FMXH000099	5794547	PBW343*2/KUKUNA//PBW343*2/KUKUNA/3/PBW343	CIMMYT	1A	No	19.6085	7.95	10.15	12.3	79.1728	15.4838	23.7333	7.8	8.1	3.4	13.7	13.35	11.8	12.8	11.7891	174.126	51.6028
PA20FMXH000100	5794829	INQALAB 91*2/KUKUNA//2*KRONSTAD F2004	CIMMYT	1B	No	8.08322	4.725	9.65	6.6	61.6317	9.44526	6.72118	4	5.45	9.5	8.5	10.95	7.2	6	91.5679	37.7295	55.5978
PA20FMXH000101	5894946	T.DICOCCON PI94625/AE.SQUARROSA (372)//TUI/CLMS/3/2*PASTOR/4/EXCALIBUR	CIMMYT	1B	No	16.2134	7.425	13.1333	6.33333	68.7534	11.1377	21.2892	9	5.85	12.6	12.3	14.5	7	5.66667	67.7242	95.8603	42.6758
PA20FMXH000102	6001093	SOKOLL/ROLF07	CIMMYT	1B	No	6.84837	7.975	6.9	5.94444	41.7031	7.3655	6.33124	10.7	5.25	5.2	8	7.5	6	5.88889	42.5741	51.9747	30.5606
PA20FMXH000103	6000673	KABY/BAV92/3/CROC_1/AE.SQUARROSA (224)//OPATA/4/WHEAR/5/ATTILA/BAV92//PASTOR	CIMMYT	1B	No	9.70868	8.125	11.0167	9.8	91.9539	9.30999	10.1074	9.8	6.45	8.2	12.4	12.45	6.8	12.8	83.569	140.866	51.4265
PA20FMXH000104	5999807	VORB/4/D67.2/PARANA 66.270//AE.SQUARROSA (320)/3/CUNNINGHAM	CIMMYT	1B	No	3.07135	9	11.125	7.07955	123.531	0.8	5.3427	9.4	8.6	8.125	12.2	13.05	4.25	9.90909	89.1727	219.334	62.0866
PA20FMXH000105	6176474	KACHU #1//PI 610750/SASIA/3/KACHU	CIMMYT	1B	No	15.3885	13.8	7.38333	8.66667	44.8128	8.4188	22.3582	18.05	9.55	5.4	9.5	7.25	11	6.33333	65.009	34.2835	35.1459
PA20FMXH000106	6340604	CHIBIA//PRLII/CM65531/3/MISR 2/4/HEILO/5/FRET2/KUKUNA//FRET2	CIMMYT	1B	No	9.54046	12.95	7.83333	6.6	36.1158	4.63609	14.4448	14.9	11	6.2	5.9	11.4	5.5	7.7	63.4683	6.49018	38.389
PA20FMXH000107	6000632	CNO79//PF70354/MUS/3/PASTOR/4/BAV92/5/ATTILA*2/PBW65/6/PBW343*2/TUKURU	CIMMYT	1B	No	5.9066	6.675	13.2767	18.55	158.783	5.17137	6.64183	7.7	5.65	8.8	14.2	16.83	20	17.1	90.4398	295.848	90.0605
PA20FMXH000108	6001555	GOUBARA-1/2*SOKOLL	CIMMYT	1B	No	10.2511	7.775	9.86852	5.33333	83.3584	8.66815	11.8341	8.4	7.15	7.55556	11	11.05	4.44444	6.22222	60.7521	157.42	31.903
PA20FMXH000109	6340966	FRNCLN/HEILO//FRNCLN	CIMMYT	1B	No	6.17945	7.575	12.1917	12.125	136.791	7.26316	5.09575	7.9	7.25	8.375	13.2	15	15	9.25	63.0221	285.895	61.4546
PA20FMXH000110	6000906	SOKOLL*2/TROST	CIMMYT	1B	No	6.88605	9.975	9.45	8.10556	89.5843	7.98227	5.78982	11.95	8	8	9.1	11.25	9.1	7.11111	84.6369	114.789	69.3267
PA20FMXH000111	6332106	CHIBIA//PRLII/CM65531/3/MISR 2/4/MUNAL #1	CIMMYT	1B	No	17.6228	10.925	12.2	7.625	155.765	9.07888	26.1667	15.3	6.55	8.2	15.5	12.9	7	8.25	151.345	224.712	91.2372
PA20FMXH000112	6418272	ATTILA/3*BCN*2//BAV92/3/HEILO/4/CHIBIA//PRLII/CM65531/3/MISR 2	CIMMYT	1B	No	6.57605	5.675	9.26667	8.9875	85.5397	5.30688	7.84523	6.15	5.2	6.4	11.5	9.9	6.1	11.875	74.9657	145.858	35.7951
PA20FMXH000113	6279648	KRICHAUFF/2*PASTOR/4/CROC_1/AE.SQUARROSA (224)//2*OPATA/3/2*RAC655/5/PARUS/PASTOR	CIMMYT	1B	No	10.2822	7.325	10.5167	7.22222	80.9267	8.04561	12.5187	10.5	4.15	9.3	11.6	10.65	8	6.44444	96.6405	95.4835	50.656
PA20FMXH000114	6418536	GRACK/PVN	CIMMYT	1B	No	16.3984	8	9.28519	7.45	126.924	10.9848	21.8121	8.25	7.75	5.2	11.5556	11.1	8.9	6	66.6812	244.317	69.7728
PA20FMXH000115	6603989	PFAU/WEAVER*2//TRANSFER#12,P88.272.2*2/4/CHIBIA//PRLII/CM65531/3/MISR 2	CIMMYT	1B	No	15.0536	7.725	12.4833	12.6429	137.187	7.95316	22.1541	7.45	8	8.8	14.4	14.25	11	14.2857	163.182	191.095	57.2839
PA20FMXH000116	6691417	1447/PASTOR//KRICHAUFF/3/2*NAVJ07	CIMMYT	1B	No	4.29462	10.5	9.14091	5.89583	89.7717	1.91146	6.67778	14.65	6.35	8.7	9.27273	9.45	8.66667	3.125	156.221	90.41	22.6844
PA20FMXH000117	6691015	KA/NAC//TRCH*2/3/VORB	CIMMYT	1B	No	4.3347	11.125	9.64074	12.6125	115.084	3.93664	4.73277	13.95	8.3	5.22222	12.3	11.4	8.6	16.625	37.4442	272.107	35.6995
PA20FMXH000118	6566827	KIRITATI//2*PRL/2*PASTOR/3/CHONTE/5/PRL/2*PASTOR/4/CHOIX/STAR/3/HE1/3*CNO79//2*SERI	CIMMYT	1B	No	12.111	8.525	10.0167	9.39444	70.9	9.54525	14.6768	12.35	4.7	12	8.6	9.45	6.9	11.8889	76.1382	87.6964	48.8654
PA20FMXH000119	6860961	PRL/2*PASTOR//PBW343*2/KUKUNA/3/GONDO/CBRD/4/NELOKI	CIMMYT	1B	No	3.41005	6.65	3.25556	10.0286	25.3606	1.94315	4.87694	7.3	6	2.55556	4.11111	3.1	12.2	7.85714	35.7912	32.7805	7.50998
PA20FMXH000120	6861216	QUAIU//NG8675/CBRD/3/QUAIU #1	CIMMYT	1B	No	18.8567	6.7	10.8407	6.88889	201.594	0.818268	36.8952	5.4	8	7	13.2222	12.3	6.88889	NA	63.5579	472.91	68.3145
PA20FMXH000121	6691087	TOB/ERA//TOB/CNO67/3/PLO/4/VEE#5/5/KAUZ/6/FRET2/7/PASTOR/3/BJY/COC//PRL/BOW	CIMMYT	1B	No	13.7482	11.975	10.0493	9.5	88.6485	8.45419	19.0422	16.05	7.9	7.77778	11	11.37	7	12	93.0282	106.231	66.6867
PA20FMXH000122	2806	ALONDRA	CIMMYT	1B	No	24.3834	6.7	11.9	9.96111	124.63	21.3944	27.3725	8.1	5.3	9.5	14.8	11.4	8.7	11.2222	89.2986	226.714	57.8756
PA20FMXH000123	5398610	BLOUK #1	CIMMYT	1B	No	10.7643	8.45	11.4667	4.36806	118.807	8.39428	13.1344	9.05	7.85	8.4	15.5	10.5	5.11111	3.625	84.3984	232.24	39.7824
PA20FMXH000124	1396801	CANINDE #1	CIMMYT	1B	No	27.6898	10.35	8.16667	15.3	73.0258	24.2465	31.1331	12.3	8.4	7.5	10	7	15.9	14.7	97.5997	58.4145	63.063
PA20FMXH000125	5307520	CHIBIA//PRLII/CM65531/3/MISR 2	CIMMYT	1B	No	8.01809	8.85	10.6283	12.3	95.3099	6.78265	9.25353	10.15	7.55	7.66667	12.8182	11.4	16.3	8.3	85.7185	131.461	68.7503
PA20FMXH000126	4248	CIANO T 79	CIMMYT	1B	No	15.8344	6.025	7.78333	3.46667	43.6168	14.1596	17.5093	9.2	2.85	5.4	9.8	8.15	3.1	3.83333	51.3621	28.0763	51.4119
PA20FMXH000127	5535398	DANPHE	CIMMYT	1B	No	47.9464	14.125	12.2167	19	141.832	35.2025	60.6903	16.45	11.8	9.7	12.1	14.85	20	18	106.372	210.113	109.011
PA20FMXH000128	4754187	HUIRIVIS #1	CIMMYT	1B	No	15.5678	10.475	10.9667	12.7318	148.616	13.5212	17.6144	12.35	8.6	6.4	13.3	13.2	15.1	10.3636	62.4909	312.022	71.3353
PA20FMXH000129	12725	MILAN	CIMMYT	1B	No	53.5767	15.1	11.37	17.05	136.474	46.0237	61.1296	19.15	11.05	9.7	12.2	12.21	19.2	14.9	248.032	71.9378	89.4539
PA20FMXH000130	4319982	MURGA	CIMMYT	1B	No	7.96942	11.6	8.43667	9.75	77.9948	3.65541	12.2834	14.6	8.6	5.5	12.2	7.61	9.1	10.4	47.3263	121.822	64.8358
PA20FMXH000131	4754362	MUTUS	CIMMYT	1B	No	19.7335	12.625	10.9833	7.85	90.3533	21.7018	17.7652	15.85	9.4	6.2	11.9	14.85	7.6	8.1	88.6709	159.795	22.5945
PA20FMXH000132	5535348	ND643/2*WBLL1	CIMMYT	1B	No	29.6824	10.65	10.4833	13.2	60.6161	23.4658	35.8989	11	10.3	8.8	10.8	11.85	6.9	19.5	46.5975	77.2526	57.9981
PA20FMXH000133	5794268	NG8201/KAUZ/4/SHA7//PRL/VEE#6/3/FASAN/5/MILAN/KAUZ/6/ACHYUTA/7/PBW343*2/KUKUNA	CIMMYT	1B	No	16.0189	16.55	8.7	15.1	99.6312	26.6066	5.43115	19.75	13.35	7.5	11.7	6.9	11.1	19.1	79.0947	145.121	74.678
PA20FMXH000134	5793086	PFAU/MILAN//PBW343*2/TUKURU	CIMMYT	1B	No	19.1721	10.9	10.6667	14.25	72.6427	15.9828	22.3614	13.1	8.7	6.3	11.2	14.5	15.6	12.9	68.9779	54.8909	94.0592
PA20FMXH000135	3585425	RPB709.71/COC	CIMMYT	1A	No	18.6327	6.5	9.94242	6.2	112.71	5.83691	31.4286	7.45	5.55	6.72727	11.7	11.4	5.7	6.7	63.0221	196.463	78.6458
PA20FMXH000136	5435851	SOKOLL//W15.92/WBLL1	CIMMYT	1B	No	14.501	7.925	10.7407	8.57778	88.5102	6.04001	22.962	7.6	8.25	8.22222	11.7	12.3	7.55556	9.6	75.39	85.2806	104.86
PA20FMXH000137	4559218	TINAMOU	CIMMYT	1B	No	24.2301	10.175	11.0926	9.75	91.4225	20.8301	27.6302	8.2	12.15	7.77778	12.7	12.8	7	12.5	59.5638	139.546	75.1573
PA20FMXH000138	5794462	WAXWING*2//INQALAB 91*2/KUKUNA	CIMMYT	1B	No	15.3365	10.1	9.11667	4.53968	65.746	17.9837	12.6894	11	9.2	5.1	13.1	9.15	4.22222	4.85714	59.4799	114.078	23.6803
PA20FMXH000139	5551820	WHEAR/KUKUNA/3/C80.1/3*BATAVIA//2*WBLL1	CIMMYT	1B	No	23.9427	10.2	10.5333	10.15	109.811	15.9944	31.891	12.95	7.45	7.2	12.1	12.3	11.1	9.2	80.6726	141.685	107.075
PA20FMXH000140	6179640	MUNAL #1	CIMMYT	1B	No	9.77147	17.15	11.1	7.34921	170.537	5.78043	13.7625	24.6	9.7	6.5	14.8	12	3.55556	11.1429	68.3532	318.159	125.1
PA20FMXH000141	6178538	SAUAL/KIRITATI//SAUAL	CIMMYT	1A	No	8.82684	7.225	11.4833	6.61111	173.542	3.26556	14.3881	9.35	5.1	8.4	15.4	10.65	2.22222	11	158.715	305.126	56.7852
PA20FMXH000142	3577890	NAXOS	Germany	1A	No	NA	NA	4.5	8.2	6.81644	NA	NA	NA	NA	4.5	NA	NA	8.2	NA	6.81644	NA	NA
PA20FMXH000143	279940	NASMA	Moroco	1A	No	14.9637	12.775	10.4	12.5429	224.044	15.5655	14.3618	13	12.55	7.9	12.9	NA	6.28571	18.8	51.9986	396.089	NA
PA20FMXH000144	8869	WL 711	CIMMYT	1B	No	18.2179	8.3	8.51364	6.4625	176.807	31.8846	4.55128	11.35	5.25	6.3	10.7273	NA	2.125	10.8	59.6571	293.958	NA
PA20FMXH000146	897779	HXL8144	China	1A	No	2.1022	4.725	8.56667	3.72222	104.068	1.73514	2.46927	4.7	4.75	5.33333	11.8	NA	1	6.44444	24.8792	183.257	NA
PA20FMXH000147	8297	NANJING8611	China	2A	No	6.02657	3.55	4.5	1.16667	32.1331	1.67015	10.383	4.5	2.6	1	8	NA	NA	1.16667	12.1419	52.1242	NA
PA20FMXH000148	80132	SW87-2323	China	2A	No	8.4639	4.28975	3.65	1.6	10.6175	10.3065	6.6213	7.3	1.2795	1	6.3	NA	2	1.2	6.12468	15.1104	NA
PA20FMXH000149	216883	JINGHONG 7	China	1A	Yes	34.2214	5.8	7.75	4.10714	84.7893	63.2847	5.15813	8.7	2.9	6.6	8.9	NA	2.5	5.71429	42.2025	127.376	NA
PA20FMXH000151	8750720	7P3	China	2C	Yes	1.14462	0.73625	2.85	2.28571	4.98678	0.27933	2.00991	0.9385	0.534	1	4.7	NA	1	3.57143	1.47427	8.49929	NA
PA20FMXH000152	8750721	Annong0219	China	2B	No	15.2565	4.55025	5.35	2	41.0894	24.2333	6.27968	6.75	2.3505	1.2	9.5	NA	3	1	5.55425	76.6246	NA
PA20FMXH000153	8750722	Annong04156	China	2C	No	17.4718	9.3	6	8.79167	11.5553	13.9802	20.9635	11.45	7.15	3.2	8.8	NA	3.33333	14.25	14.8031	8.30758	NA
PA20FMXH000155	8750724	Annong95081-8	China	2C	No	17.282	7.625	6.86364	11.5	65.265	13.5494	21.0145	8.05	7.2	3.72727	10	NA	5.5	17.5	33.5355	96.9944	NA
PA20FMXH000156	8750725	Chuanmai39	China	2C	No	23.3333	16.3	4.35	15.3	16.0729	23.3333	NA	16.3	NA	4.7	4	NA	18.6	12	25.7147	6.43116	NA
PA20FMXH000157	5592459	Chuanmai42	China	2A	Yes	10.6783	5.825	5.28409	6.7	19.8511	7.54902	13.8075	6.5	5.15	1.75	8.81818	NA	7.9	5.5	5.65388	34.0484	NA
PA20FMXH000158	8750726	Chuannong17	China	2C	No	7.54103	0.921	4.84444	2.88889	9.85235	7.01754	8.06452	NA	0.921	1.8	7.88889	NA	2.77778	3	3.88894	15.8158	NA
PA20FMXH000159	8750727	Chuannong43	China	2A	No	6.50638	4.9	5.63182	3.08333	40.2646	4.36832	8.64443	6.45	3.35	3.36364	7.9	NA	3.16667	3	16.6061	63.923	NA
PA20FMXH000160	5119758	Demai3	China	1A	Yes	32.2856	8.75	7.74091	13.0056	72.8651	39.5967	24.9745	9.05	8.45	3.18182	12.3	NA	8.9	17.1111	29.463	116.267	NA
PA20FMXH000161	3827797	Emai12	China	2A	No	NA	NA	3.35	8.46667	11.0637	NA	NA	NA	NA	1.2	5.5	NA	12.6	4.33333	15.1793	6.94808	NA
PA20FMXH000162	8750728	Emai15	China	2A	No	16.8919	7.025	7.15	7.00556	40.7764	11.5682	22.2155	7.95	6.1	3.3	11	NA	7.9	6.11111	11.6856	69.8672	NA
PA20FMXH000163	8750729	Emai16	China	2C	No	56.4937	11.3	6	12.8167	20.3961	56.4937	NA	11.3	NA	3.5	8.5	NA	13.3	12.3333	6.75369	34.0386	NA
PA20FMXH000164	8750730	Emai17	China	2A	No	14.0505	6.7	9.8875	5.64583	86.7664	10.2964	17.8047	9	4.4	7.375	12.4	NA	1.625	9.66667	41.1564	132.376	NA
PA20FMXH000165	8750731	Emai18	China	2A	No	10.134	6.575	6.85	9.35	50.3409	6.83299	13.435	7.8	5.35	2.6	11.1	NA	14.7	4	7.72795	92.9538	NA
PA20FMXH000166	8750732	Emai19	China	2A	No	20.6059	7.625	3.85	5.85	18.8866	18.8501	22.3617	8.3	6.95	1	6.7	NA	6.4	5.3	29.3077	8.46539	NA
PA20FMXH000167	8750733	Emai21	China	2A	No	5.15741	6.425	5.10455	4.83889	30.8118	4.86272	5.4521	8.1	4.75	1.3	8.90909	NA	5.9	3.77778	14.551	47.0726	NA
PA20FMXH000168	8750734	Emai22	China	2A	Yes	10.3974	8.525	8.25	5.55	32.6846	10.1382	10.6566	9.25	7.8	5.1	11.4	NA	4.7	6.4	21.6853	43.6839	NA
PA20FMXH000169	8750735	Emai23	China	2A	Yes	11.0255	8.125	6.06364	9.5625	17.7631	10.9083	11.1428	9.1	7.15	2.4	9.72727	NA	10	9.125	5.5396	29.9866	NA
PA20FMXH000170	8750736	Emai24	China	2C	No	25.8823	5.55	6.35	2.55	45.1771	20.0843	31.6802	5.9	5.2	3.5	9.2	NA	2.6	2.5	9.33493	81.0192	NA
PA20FMXH000171	8750737	Emai25	China	2A	No	7.62117	10.75	7.55	6.6	53.2099	8.65723	6.58511	11.35	10.15	3	12.1	NA	3.8	9.4	7.18634	99.2335	NA
PA20FMXH000172	8750738	Emai251	China	2A	No	25.4186	7.95	6.3	7.8125	68.0056	27.2356	23.6016	10.5	5.4	3.8	8.8	NA	6	9.625	6.53427	129.477	NA
PA20FMXH000173	8750739	Emai26	China	2B	No	6.4476	5.475	3.25	5.15	18.3041	6.94213	5.95307	6.65	4.3	1	5.5	NA	6.8	3.5	8.25566	28.3526	NA
PA20FMXH000174	8750740	Emai27	China	2C	No	18.7286	5.925	5.45	3.45	39.2697	12.2256	25.2315	5.8	6.05	1	9.9	NA	2.1	4.8	11.1442	67.3953	NA
PA20FMXH000175	8750741	Emai352	China	2A	No	5.12891	3.55	8.12778	8.75	49.7718	4.18848	6.06935	3.9	3.2	3.55556	12.7	NA	9.5	8	11.6551	87.8885	NA
PA20FMXH000176	8750742	Emai580	China	2A	No	13.5357	5.475	5.1	5.87222	14.7888	8.85687	18.2145	6.85	4.1	1.3	8.9	NA	6.3	5.44444	14.2291	15.3484	NA
PA20FMXH000177	8750743	Emai596	China	2C	No	19.3382	7.6	2.3	4.575	12.0077	10.061	28.6153	8.35	6.85	1	3.6	NA	6.4	2.75	11.2413	12.7741	NA
PA20FMXH000179	8750745	Fengyou3	China	2C	No	37.9747	NA	7.2	4.19841	54.3374	37.9747	NA	NA	NA	3	11.4	NA	3.28571	5.11111	5.66434	103.011	NA
PA20FMXH000180	8750746	Gangtai8944	China	2A	Yes	1.54027	1.28525	4.35	1.35	13.1444	0.491546	2.589	1.508	1.0625	1	7.7	NA	1.2	1.5	4.3726	21.9163	NA
PA20FMXH000181	8750747	Guandong107	China	2B	Yes	6.3323	4.375	8.15	4.91429	136.658	4.39103	8.27357	3.55	5.2	4.1	12.2	NA	3.42857	6.4	44.2738	229.043	NA
PA20FMXH000184	8750749	Hua2152	China	2C	No	29.0827	6.5	6.75	9.37222	72.3332	32.3715	25.794	6.45	6.55	1.5	12	NA	11.3	7.44444	11.0479	133.618	NA
PA20FMXH000185	8750750	Hua2459	China	2A	No	36.3411	9.775	8.11667	15.4	39.6959	44.4955	28.1868	12.1	7.45	3.33333	12.9	NA	20	10.8	19.786	59.6058	NA
PA20FMXH000186	8750751	Huaimai18	China	2A	Yes	21.8945	9.05	5.4	13.75	33.5376	22.7675	21.0216	12.8	5.3	3	7.8	NA	19.1	8.4	29.7045	37.3706	NA
PA20FMXH000188	8750753	Huamai12	China	2A	Yes	15.5881	6.5	5.25	10.25	21.5797	13.5529	17.6233	9.35	3.65	1.1	9.4	NA	16.3	4.2	15.0328	28.1265	NA
PA20FMXH000189	8750754	Huamai5	China	2C	No	42.2258	0.845	5.2	6.75	39.0763	68.4211	16.0305	NA	0.845	1.2	9.2	NA	8.4	5.1	4.45557	73.697	NA
PA20FMXH000190	8750755	Huamai6	China	2B	No	16.2614	4.85	3.6	3	19.722	20.0174	12.5054	4.9	4.8	1.2	6	NA	3.5	2.5	15.859	23.5849	NA
PA20FMXH000191	290605	Huamai8	China	2A	No	4.96544	4.425	6.25	4.85	21.9238	1.88172	8.04916	4.35	4.5	2.7	9.8	NA	7.7	2	18.8368	25.0108	NA
PA20FMXH000192	8750756	Huapei1	China	2A	No	14.3041	6.375	7.40909	2.16667	67.8718	7.97264	20.6356	8.85	3.9	1.90909	12.9091	NA	1.33333	3	5.06018	130.683	NA
PA20FMXH000198	8750761	Lianmai159	China	2B	No	4.72269	3.675	7.3	4.42857	37.2809	2.8883	6.55708	3.55	3.8	5.3	9.3	NA	3	5.85714	52.5869	21.9748	NA
PA20FMXH000199	8750763	Mian2000-1-37	China	2C	Yes	14.3467	5.45	2.72727	3.08889	4.24556	12.168	16.5254	5.1	5.8	1.45455	4	NA	4.77778	1.4	3.16279	5.32834	NA
PA20FMXH000200	7810929	Mianmai37	China	2A	No	10.5932	6.65	3.82778	7.3	29.6241	6.73122	14.4551	6.95	6.35	1.55556	6.1	NA	13.6	1	1.33017	57.918	NA
PA20FMXH000201	8750764	Nannong06Y86	China	2B	Yes	2.52588	2.125	5.8	2.21667	33.1385	2.22303	2.82873	2.15	2.1	1.9	9.7	NA	3.1	1.33333	7.47692	58.8001	NA
PA20FMXH000202	8750765	Nannong9918	China	2B	No	12.3358	5.325	2.4	3.19286	8.26837	15.6892	8.98236	6.45	4.2	1.1	3.7	NA	5.1	1.28571	3.37056	13.1662	NA
PA20FMXH000203	8750766	Ning894013	China	2C	Yes	0.965701	3.65	4.2	1.4	17.5049	0.649351	1.28205	3.7	3.6	2	6.4	NA	1.3	1.5	11.6551	23.3548	NA
PA20FMXH000204	8750767	Ning894037	China	2C	Yes	9.23077	2.3	5.1	1.33333	57.6685	9.23077	NA	2.3	NA	2	8.2	NA	1.66667	1	9.98436	105.353	NA
PA20FMXH000205	8750768	Ningfeng518	China	2C	Yes	15.1058	6.65	1.8	4.2125	4.34224	13.7938	16.4177	6.85	6.45	1	2.6	NA	7.3	1.125	4.26025	4.42423	NA
PA20FMXH000206	2450406	Ningmai10	China	2B	No	15.3004	6.975	4.31111	8.00556	7.82786	14.6276	15.9733	7.3	6.65	1.4	7.22222	NA	13.9	2.11111	10.702	4.95375	NA
PA20FMXH000207	8750769	Ningmai11	China	2C	No	20.9673	4.475	4.55556	9.84444	22.3156	13.9935	27.9412	6.05	2.9	1	8.11111	NA	17.8	1.88889	1.98545	42.6457	NA
PA20FMXH000208	8750770	Ningmai12	China	2C	No	38.7927	5.175	4.16162	4.08333	11.9238	45.0226	32.5629	5.85	4.5	1.54545	6.77778	NA	6.5	1.66667	10.2773	13.5703	NA
PA20FMXH000209	8750771	Ningmai13	China	2C	Yes	41.1056	6.175	2.88889	2.61111	35.6593	30.9524	51.2588	8.5	3.85	1	4.77778	NA	3.22222	2	17.0728	54.2458	NA
PA20FMXH000210	8750772	Ningmai15	China	2B	Yes	5.97796	2.275	4.1	2.77778	6.99344	5.89798	6.05795	2.85	1.7	1.8	6.4	NA	2.77778	NA	4.1448	9.84208	NA
PA20FMXH000211	8750773	Ningmai16	China	2B	Yes	8.09414	5.825	4.5	2.4375	28.7557	7.98533	8.20294	5.95	5.7	2.3	6.7	NA	3.375	1.5	6.29495	51.2166	NA
PA20FMXH000213	8750774	Ningmai18	China	2B	Yes	7.90822	3.675	3.8	3.5	14.4227	10.5169	5.29955	4.1	3.25	1	6.6	NA	6	1	4.83427	24.0111	NA
PA20FMXH000214	8750775	Ningmai19	China	2C	No	16.2899	5.825	3.30556	1.72222	21.9429	15.0018	17.578	6.95	4.7	1.11111	5.5	NA	2.44444	1	8.40414	35.4816	NA
PA20FMXH000215	8750776	Ningmai20	China	2B	Yes	19.3666	3.625	8.65	9.8	35.6561	21.0005	17.7327	3.8	3.45	5.7	11.6	NA	8.8	10.8	51.2844	20.0278	NA
PA20FMXH000218	8750779	Ningmai23	China	2B	Yes	9.09091	4.7	6.3	3.85	16.5896	9.09091	NA	4.7	NA	3.7	8.9	NA	2.7	5	14.0152	19.164	NA
PA20FMXH000219	8750780	Ningmai24	China	2A	Yes	10.6306	5.75	4.8	6.12143	29.2985	11.2736	9.98761	6.6	4.9	1.1	8.5	NA	10.1	2.14286	26.7726	31.8245	NA
PA20FMXH000220	402316	Ningmai3	China	2C	No	33.7675	NA	5.91667	6.375	31.3618	33.7675	NA	NA	NA	3.5	8.33333	NA	2.75	10	36.0662	26.6575	NA
PA20FMXH000221	161179	Ningmai7	China	2C	Yes	10.7066	5.225	3.55	2.9375	29.513	14.7337	6.67956	6.3	4.15	1	6.1	NA	3.875	2	14.7935	44.2324	NA
PA20FMXH000222	381515	Ningmai8	China	2C	No	16.3453	7.875	2.71111	7.95	15.4681	14.5221	18.1685	7	8.75	1.22222	4.2	NA	8.9	7	13.9764	16.9598	NA
PA20FMXH000223	5129231	Ningmai9	China	2C	Yes	5.24853	3.8	2.3	2.38889	6.06566	3.38461	7.11246	3.35	4.25	1	3.6	NA	3.77778	1	2.78465	9.34667	NA
PA20FMXH000224	8750781	Ningyan1	China	2C	Yes	1.89322	7.475	2.1	1.58036	3.54901	0.886	2.90044	5.75	9.2	1	3.2	NA	1.875	1.28571	2.08147	5.01655	NA
PA20FMXH000225	8750782	Nongda116	China	2C	Yes	22.9631	5.725	2.3	11	14.8347	25	20.9262	8.1	3.35	1	3.6	NA	17.5	4.5	22.2657	7.40371	NA
PA20FMXH000227	150863	Shan229	China	2A	No	2.87695	6.025	7.2	5.95	68.449	3.15107	2.60284	6.3	5.75	1.8	12.6	NA	6.9	5	33.745	103.153	NA
PA20FMXH000228	8750784	Shan253	China	2A	Yes	6.21305	8.575	4	5.5	5.20917	5	7.42611	8.8	8.35	1.5	6.5	NA	5.5	NA	3.8248	6.59354	NA
PA20FMXH000229	8750785	Shan938	China	2C	Yes	23.1481	6.1	5.85	3.51429	22.8357	23.1481	NA	6.1	NA	6.3	5.4	NA	3.6	3.42857	39.8509	5.82048	NA
PA20FMXH000231	8750787	Shannong9625	China	2C	Yes	14.1989	0.336	2.83333	8.025	5.38882	19.697	8.70085	NA	0.336	1	4.66667	NA	12.3	3.75	7.29623	3.48141	NA
PA20FMXH000232	8750788	Shanyou225	China	2C	No	4.4959	7.325	3.35	6.9	14.5166	2.94118	6.05062	8.1	6.55	1.3	5.4	NA	6.9	NA	22.5139	6.51921	NA
PA20FMXH000234	5119763	Shengkang2	China	2C	No	28.7471	NA	3	9.95	12.7198	28.7471	NA	NA	NA	1.5	4.5	NA	18.9	1	21.3335	4.10602	NA
PA20FMXH000235	8750790	Shengxuan3	China	2C	No	27.4455	6.225	3.9	9.7	15.0264	19.0325	35.8586	7.85	4.6	1.1	6.7	NA	9.7	NA	16.4824	13.5703	NA
PA20FMXH000236	8750791	Shengxuan4	China	2C	Yes	7.84351	5.075	3	14.9	14.8499	7.7439	7.94312	6.5	3.65	1.4	4.6	NA	14.9	NA	14.1518	15.5479	NA
PA20FMXH000237	8750792	Shenhemai1	China	2A	No	20.3054	7.825	4.8	15.7	28.3309	25.0423	15.5684	8.45	7.2	1	8.6	NA	15.7	NA	5.08159	51.5802	NA
PA20FMXH000238	8750793	Sumai188	China	2C	Yes	11.0505	5.725	3.35	13.8	9.58485	3.61297	18.488	5.4	6.05	1.1	5.6	NA	13.8	NA	2.25257	16.9171	NA
PA20FMXH000239	7253171	Sumai3	China	2C	Yes	6.61993	1.394	4.35	NA	32.0399	0.492611	12.7473	1.85	0.938	1	7.7	NA	NA	NA	3.58359	60.4962	NA
PA20FMXH000240	8750794	Sumai5	China	2C	Yes	7.5676	5.35	2.9	3.5	24.1805	5.98717	9.14803	3.9	6.8	1	4.8	NA	3.5	NA	30.2709	18.0901	NA
PA20FMXH000241	8750795	Sumai6	China	2C	No	6.00938	9.425	5.9	15.1	89.5917	5.37002	6.64875	11.35	7.5	1	10.8	NA	15.1	NA	14.0152	165.168	NA
PA20FMXH000243	8750797	Wan9926	China	2A	No	3.71117	8.925	3.2	5.95	15.3225	2.67785	4.74449	10.65	7.2	1	5.4	NA	10.9	1	8.80964	21.8354	NA
PA20FMXH000244	8750798	Wanmai23	China	2C	No	12.3272	7.15	4.95	3.05	8.55741	9.04968	15.6048	7.15	7.15	1.5	8.4	NA	4.1	2	5.57606	11.5387	NA
PA20FMXH000245	8750799	Wanmai26	China	2A	No	8.41764	7.85	6.03333	7.75	82.8318	8.93966	7.89561	4.2	11.5	1.66667	10.4	NA	14.5	1	14.5899	151.074	NA
PA20FMXH000246	8750800	Wanmai27	China	2C	No	6.98429	10.325	3.34444	5.55	11.4275	8.70034	5.26823	9.4	11.25	1.8	4.88889	NA	9.1	2	5.83701	17.0179	NA
PA20FMXH000247	8750801	Wanmai32	China	1A	No	13.9829	4.75	2.8	7.1	13.1335	5.44554	22.5203	4.1	5.4	1.1	4.5	NA	10.4	3.8	14.9792	11.2877	NA
PA20FMXH000248	8750802	Wanmai42	China	2A	Yes	9.72044	8.225	5.17778	8.56667	32.281	17.4679	1.97293	9.2	7.25	2.55556	7.8	NA	15.3	1.83333	30.1616	34.4005	NA
PA20FMXH000249	8750803	Wanmai48	China	2A	No	22.476	8.65	5.25	8.15	61.8263	19.719	25.2329	7.15	10.15	2.7	7.8	NA	8	8.3	24.6647	98.9879	NA
PA20FMXH000250	8750804	Wanmai54	China	2A	No	2.69997	6.25	4.1	2.53571	37.9048	1.47815	3.92178	7.75	4.75	1.4	6.8	NA	1.5	3.57143	26.1169	49.6927	NA
PA20FMXH000251	8750805	Xiangmai25	China	2A	No	13.9263	6.75	3.9	1.98889	15.8807	10.3687	17.484	7.95	5.55	1.7	6.1	NA	1.2	2.77778	4.11881	27.6425	NA
PA20FMXH000252	8750806	Xiangmai55	China	2A	No	6.91066	7.275	4.1	2.88095	31.5807	4.12186	9.69945	7.65	6.9	1.1	7.1	NA	1.33333	4.42857	11.4872	51.6741	NA
PA20FMXH000255	8750809	Xiaoyan9366	China	2C	No	26.087	2.5	3.65	3.91667	14.6231	NA	26.087	NA	2.5	1.1	6.2	NA	2	5.83333	10.2732	18.973	NA
PA20FMXH000256	8750810	Xuzhou87633	China	2C	No	29.6159	7.1	7.38889	14.6	49.3731	39.5349	19.697	NA	7.1	2.77778	12	NA	12	17.2	19.3017	79.4445	NA
PA20FMXH000258	8750812	Yangfumai2	China	2C	No	28.9302	5.25	3.8	9.8	15.3851	20.8333	37.027	6.1	4.4	1.5	6.1	NA	9.2	10.4	15.9289	14.8414	NA
PA20FMXH000259	8750813	Yangfumai3	China	2C	No	33.3006	5.2	3.98333	13.6	12.503	33.3006	NA	5.2	NA	1.3	6.66667	NA	13.2	14	15.5855	9.42041	NA
PA20FMXH000260	8750814	Yangfumai4	China	2B	Yes	3.93437	1.28725	1.9	7.3	9.2464	3.70047	4.16827	1.1745	1.4	1	2.8	NA	7.3	NA	13.4534	5.03935	NA
PA20FMXH000261	8750815	Yangfumai5	China	2C	No	14.5103	6.125	2.75	7.23889	10.971	8.98231	20.0382	7.9	4.35	1.2	4.3	NA	10.7	3.77778	8.80765	13.1343	NA
PA20FMXH000262	8750816	Yangmai10	China	2C	No	22.1064	3.3	2.75	7.2	16.2422	23.9596	20.2532	NA	3.3	1.2	4.3	NA	6.6	7.8	16.4358	16.0485	NA
PA20FMXH000263	8750817	Yangmai11	China	2C	No	27.547	5.375	2.45	4.125	4.54665	37.3096	17.7843	7.05	3.7	1	3.9	NA	2.25	6	5.93347	3.15983	NA
PA20FMXH000264	8750818	Yangmai12	China	2C	No	16.5357	6.55	3.15	5.825	15.4196	12.6854	20.3859	8.5	4.6	1.7	4.6	NA	5.9	5.75	23.7094	7.12985	NA
PA20FMXH000265	8750819	Yangmai13	China	2A	No	9.86508	6.15	6.12778	6.65	34.8836	11.4231	8.30711	8.25	4.05	1.7	10.5556	NA	7.8	5.5	18.783	50.9842	NA
PA20FMXH000266	7253166	Yangmai14	China	2C	No	13.4401	4.675	3.33333	3.83333	13.1385	14.5025	12.3778	6.9	2.45	1	5.66667	NA	NA	3.83333	15.3956	10.8815	NA
PA20FMXH000267	8750820	Yangmai15	China	2C	No	48.8078	3.65	2.53636	12.5	22.2635	61.3184	36.2972	NA	3.65	1.27273	3.8	NA	20	5	30.4626	14.0645	NA
PA20FMXH000268	3550591	Yangmai158	China	2C	No	17.3388	5.775	2.76667	7.66667	17.8215	11.8056	22.872	7.65	3.9	1.2	4.33333	NA	NA	7.66667	16.0815	19.5615	NA
PA20FMXH000269	7253164	Yangmai16	China	2C	No	30.1001	6.675	3	12.1214	11.431	23.5915	36.6087	10.95	2.4	1	5	NA	13.1	11.1429	13.3258	9.53622	NA
PA20FMXH000270	7253165	Yangmai17	China	2C	No	5.01068	6.4	2.45536	10.65	8.08769	2.31186	7.70949	5.65	7.15	1.28571	3.625	NA	13.8	7.5	9.17501	7.00036	NA
PA20FMXH000271	8750821	Yangmai18	China	2B	Yes	5.73276	3.675	2.25	7.23889	8.82155	4.92459	6.54094	4.55	2.8	1	3.5	NA	8.7	5.77778	8.60604	9.03707	NA
PA20FMXH000272	8750822	Yangmai19	China	2C	No	16.0281	6.225	2.2	10.8143	12.8365	11.5328	20.5233	9.55	2.9	1.1	3.3	NA	16.2	5.42857	17.7144	7.95865	NA
PA20FMXH000273	8750823	Yangmai20	China	2C	No	21.7789	5.25	2.22222	9.2	11.9166	21.2336	22.3242	8.35	2.15	1	3.44444	NA	12.4	6	10.3575	13.4757	NA
PA20FMXH000274	8750824	Yangmai21	China	2B	Yes	11.6578	8.525	3	6.4875	22.5083	12.7841	10.5315	10.9	6.15	1.1	4.9	NA	3.6	9.375	8.68849	36.3281	NA
PA20FMXH000275	8750825	Yangmai22	China	2C	No	21.3082	4.65	2.05	10.4778	18.0152	18.1891	24.4274	7.25	2.05	1	3.1	NA	15.4	5.55556	19.8077	16.2226	NA
PA20FMXH000276	8750826	Yangmai23	China	2C	Yes	29.7065	5.8	2.6	7.12778	17.843	25.6757	33.7374	8.85	2.75	1.2	4	NA	6.7	7.55556	25.9749	9.71113	NA
PA20FMXH000277	64807	Yangmai5	China	2C	No	24.8124	5.85	3.5	7.85714	13.5574	18.2192	31.4055	7.6	4.1	1.5	5.5	NA	NA	7.85714	7.20944	19.9054	NA
PA20FMXH000278	7253167	Yangmai6	China	2B	Yes	18.2777	9.675	2.25	8.12778	12.6996	17.5403	19.0152	9.8	9.55	1	3.5	NA	12.7	3.55556	12.28	13.1192	NA
PA20FMXH000279	5120515	Yangmai9	China	2C	No	10.2039	5.575	2.95	6.75	10.6111	9.62228	10.7855	8.4	2.75	1	4.9	NA	7.5	6	3.45982	17.7624	NA
PA20FMXH000280	8750827	Yangnuomai1	China	2C	No	7.2101	6.625	3.9	9.5625	18.0005	5.448	8.9722	8.2	5.05	1.3	6.5	NA	10.5	8.625	16.9358	19.0651	NA
PA20FMXH000281	8750828	Yu02321	China	2A	No	4.94115	9.525	7.31111	8.81667	58.2991	3.38424	6.49806	11.7	7.35	3.22222	11.4	NA	11.8	5.83333	15.3328	101.265	NA
PA20FMXH000282	8750829	Yumai10	China	2A	No	36.4475	7.95	4.4	10.7	14.9148	39.6226	33.2724	NA	7.95	1.6	7.2	NA	17	4.4	16.1474	13.6822	NA
PA20FMXH000283	394125	Yumai18	China	2C	Yes	9.09888	3.675	2.85	6.3875	9.66091	2.6422	15.5556	4.3	3.05	1.1	4.6	NA	9.4	3.375	13.1097	6.21208	NA
PA20FMXH000284	6948007	Yumai34	China	2C	No	6.87609	4.6	2.65	2.5	26.4165	4.24125	9.51093	5.2	4	1.1	4.2	NA	1.71429	3.28571	20.38	32.4529	NA
PA20FMXH000285	8750830	Yumai66	China	2C	No	32.782	10.3	6.1	10.6875	85.0006	32.782	NA	10.3	NA	1.6	10.6	NA	8.5	12.875	22.5134	147.488	NA
PA20FMXH000286	8750831	Zheng9405	China	2C	No	9.33082	6.725	5.55	11.6786	8.50593	3.40774	15.2539	7.25	6.2	3.1	8	NA	10.5	12.8571	7.42875	9.58311	NA
PA20FMXH000287	8750832	Zhengmai9023	China	2C	No	20.7479	8.35	5.35	6.725	13.2507	25.6944	15.8013	11.35	5.35	3.5	7.2	NA	4.2	9.25	19.5398	6.96155	NA
PA20FMXH000288	8750833	Zhenmai11	China	2C	No	52.9938	NA	3.65556	11.7667	30.9381	52.9938	NA	NA	NA	1.11111	6.2	NA	18.2	5.33333	48.5376	13.3386	NA
PA20FMXH000289	8750834	Zhenmai168	China	2C	No	12.4613	3.275	6	6.35	23.5958	15.0661	9.85643	3.1	3.45	3.4	8.6	NA	8.7	4	16.2799	30.9116	NA
PA20FMXH000290	8750835	Zhenmai5	China	2C	Yes	NA	NA	3.65	4.13333	11.3825	NA	NA	NA	NA	2.1	5.2	NA	5.6	2.66667	7.71754	15.0474	NA
PA20FMXH000291	8750836	Zhenmai6	China	2A	No	24.3762	6.275	2.8	6.80714	20.3079	16.0618	32.6905	8.3	4.25	1.3	4.3	NA	10.9	2.71429	9.29118	31.3246	NA
PA20FMXH000292	8750837	Zhenmai9	China	2C	No	5.15263	7.525	3.55	6.16111	14.4791	1.27033	9.03494	8.6	6.45	1.6	5.5	NA	8.1	4.22222	14.027	14.9313	NA
PA20FMXH000293	3550589	Zhongyou16	China	2A	Yes	16.1157	10.625	9.68889	5.96667	196.3	10.747	21.4844	12.1	9.15	5.77778	13.6	NA	6.1	5.83333	65.1336	327.467	NA
PA20FMXH000295	8750838	Zhoumai102	China	2A	No	5.59711	7.975	9.32778	11.0333	169.478	5.89646	5.29776	8.7	7.25	6.1	12.5556	NA	10.9	11.1667	80.4443	258.511	NA
PA20FMXH000297	8750840	Zhoumai24	China	2C	No	2.48447	1.1	5.4	8.7125	35.8414	2.48447	NA	1.1	NA	2.6	8.2	NA	4.3	13.125	14.6406	57.0422	NA
PA20FMXH000298	8750841	Zhoumai98165	China	2C	Yes	16.4216	0.763	2.72727	12.05	5.29089	28.4314	4.41176	NA	0.763	1	4.45455	NA	16.5	7.6	3.28118	7.30059	NA
					SD	13.0111	2.28291	2.031	2.59967	44.2822
					MIN	0.965701	0.336	1.8	1	3.51619
					MEAN	16.8317	6.91199	6.59028	7.84319	53.705
					MAX	62.8719	17.15	13.3	20	224.044
